# Supplementary material for: “Clickable” LNA/DNA probes for fluorescence sensing of nucleic acids and autoimmune antibodies
Source: Royal Society of Chemistry journal article supplement (doi:10.1039/c3cc45507f), 2013-01-01
Supplement: c3cc45507f.pdf [file c3cc45507f.pdf]

## Supporting Information

### “Clickable” LNA/DNA Probes for Fluorescence Sensing of Nucleic Acids and Autoimmune Antibodies

*Anna S. Jørgensen, Pankaj Gupta, Jesper Wengel, and I. Kira Astakhova\**

|                                                                                                                                                                                           |     |
|-------------------------------------------------------------------------------------------------------------------------------------------------------------------------------------------|-----|
| General                                                                                                                                                                                   | S2  |
| Synthesis of monomer <b>M</b> <sup>1</sup>                                                                                                                                                | S4  |
| Chemical structures and photophysical characteristics of single molecule dyes used in this study (Table S1)                                                                               | S8  |
| Postsynthetic click chemistry                                                                                                                                                             | S9  |
| IE HPLC retention times and MALDI MS of purified oligonucleotides (Table S2)                                                                                                              | S11 |
| UV-visible and thermal denaturation studies                                                                                                                                               | S13 |
| <i>T</i> <sub>m</sub> values of the modified duplexes containing monomers <b>M</b> <sup>2</sup> – <b>M</b> <sup>5</sup> compared to <b>M</b> <sup>1</sup> -labelled references (Table S3) | S14 |
| Effect of single-nucleotide mismatch on binding affinity and fluorescence sensing of DNA/RNA targets by <b>ON7</b> and <b>ON19</b> in a medium salt buffer (Table S4)                     | S15 |
| <i>T</i> <sub>m</sub> values of the modified duplexes containing monomers <b>M</b> <sup>2</sup> – <b>M</b> <sup>5</sup> measured at the fluorophores' absorbance wavelength (Table S4)    | S16 |
| Ratio I/II of absorbance maxima of modified oligonucleotides and duplexes (Figure S5)                                                                                                     | S17 |
| Fluorescence studies                                                                                                                                                                      | S19 |
| Spectroscopic and photophysical properties of modified oligonucleotides and duplexes (Table S6)                                                                                           | S20 |
| Representative fluorescence steady-state emission and excitation spectra (Figure S6)                                                                                                      | S21 |
| Autoantibody binding assay                                                                                                                                                                | S22 |
| Fluorescence detection of antibody binding by single-stranded oligonucleotides and duplexes containing monomer <b>M</b> <sup>2</sup> (Table S7)                                           | S23 |
| Molecular modeling of interactions between fluorescent probes and proteins used in this study                                                                                             | S24 |
| Representative target titration curve (Figure S8)                                                                                                                                         | S26 |

## General

Reagents obtained from commercial suppliers were used as received. Phosphoramidite reagent **3** was prepared as described below (Scheme 1). Fluorescent azides and TBTA<sup>1</sup> for click chemistry were obtained from Lumiprobe LLC. 9,10-Diphenylanthracene (DPA), perylene, crezyl violete perchlorate and oxazine 170 used in spectral studies were recrystallized. HPLC grade light petroleum ether, methanol, ethanol, DCM and DMF were distilled and stored over activated 4Å molecular sieves. Other reagents and solvents were used as received. Photochemical studies were performed using spectroquality methanol, ethanol and cyclohexane.

Stock solutions for click chemistry were prepared as described.<sup>2</sup> Click reactions were performed in 1.5 mL eppendorf tubes (monomers **M**<sup>2</sup>–**M**<sup>4</sup>) or 1 mL reactor tubes (monomer **M**<sup>5</sup>) under argon using vigorous stirring in Emrys Creator (Personal Chemistry) in the latter case.

NMR spectra were recorded at 303 K on Bruker AVANCE III 400 MHz instrument. Chemical shifts are reported in ppm, relative to solvents peaks (DMSO-*d*<sub>6</sub>: 2.5 ppm for <sup>1</sup>H and 39.5 ppm for <sup>13</sup>C; 85% aq. H<sub>3</sub>PO<sub>4</sub>: 0.00 ppm for <sup>31</sup>P). <sup>1</sup>H NMR coupling constants are reported in Hz and refer to apparent multiplicities. ESI high resolution mass spectra were recorded in positive ion mode using PE SCIEX QSTAR pulsar mass mass spectrometer. Analytical thin-layer chromatography was performed on Kieselgel 60 F254 precoated aluminium plates (Merck). Silica gel column chromatography was performed using Merck Kieselgel 60 0.040–0.063 mm. Silica gel (0.040-0.063 mm) used for column chromatography and analytical silica gel TLC plates 60 F254 precoated aluminium plates were purchased from Merck.

---

<sup>1</sup> Tris[(1-benzyl-1H-1,2,3-triazol-4-yl)methyl] amine (TBTA): T. R. Chan, R. Hilgraf, K. B. Sharpless, V. V. Fokin, *Org. Lett.*, 2004, **6**, 2853.

<sup>2</sup> Some reviews on DNA modification with click chemistry: a) A. V. Ustinov, I. A. Stepanova, V. V. Dubnyakova, T. S. Zatsëpin, E. V. Nozhevnikova, V. A. Korshun, *Russ. J. Bioorg. Chem.*, 2010, **36**, 401; b) A.H. El-Sagheer, T. Brown, *Chem. Soc. Rev.*, 2010, **39**, 1388; c) F. Amblard, J. H. Cho, R. F. Schinazi, *Chem. Rev.*, 2009, **109**, 4207.

Unmodified DNA/RNA strands were obtained from commercial suppliers and used without further purification. Fluorescent reference probes were obtained from Exiqon and used after reverse-phase (RP) HPLC purification performed by manufacturer.

Oligonucleotide synthesis was carried out on a PerSpective Biosystems Expedite 8909 instrument in 1  $\mu$ mol scale using manufacturer's standard protocols. For incorporation of monomer **M**<sup>1</sup> a hand-coupling procedure was applied (20 min coupling). The coupling efficiencies of standard DNA phosphoramidites and reagent **3** based on the absorbance of the dimethoxytrityl cation released after each coupling varied between 95% and 100%. Cleavage from solid support and removal of nucleobase protecting groups was performed using 32% aqueous ammonia and methylamine 1:1, v/v, for 4 h at rt. The resulting oligonucleotides were purified by DMT-ON RP-HPLC using the Waters System 600 equipped with Xterra MS C18-column (5  $\mu$ m, 150 mm  $\times$  7.8 mm). Elution was performed starting with an isocratic hold of A-buffer for 5 min followed by a linear gradient to 70% B-buffer over 40 min at a flow rate of 1.0 mL/min (A-buffer: 0.05 M triethyl ammonium acetate, pH 7.4; B-buffer: 25% buffer A, 75% CH<sub>3</sub>CN). RP-purification was followed by detritylation (80% aq. AcOH, 30 min), precipitation (acetone, -18 °C, 12 h) and washing with acetone three times. The identity and purity of oligonucleotides was then verified by MALDI-TOF mass spectrometry and IE HPLC, respectively. IE HPLC was performed using the Merck Hitachi LaChrom instrument equipped with Dionex DNAPac Pa-100 column (250 mm  $\times$  4 mm). Elution was performed starting with an isocratic hold of A- and C-buffers for 2 min followed by a linear gradient to 60% B-buffer over 28 min at a flow rate of 1.0 mL/min (A-buffer: MQ water; B-buffer: 1M NaClO<sub>4</sub>, C-buffer: 25mM Tris-Cl, pH 8.0). MALDI-TOF mass-spectrometry analysis was performed using a MALDI-LIFT system on the Ultraflex II TOF/TOF instrument from Bruker and using HPA-matrix (10 mg 3-hydroxypicolinic acid, 50 mM ammonium citrate in 70% aqueous acetonitrile).

## Synthesis of monomer **M**<sup>1</sup>

### Scheme S1<sup>a</sup>

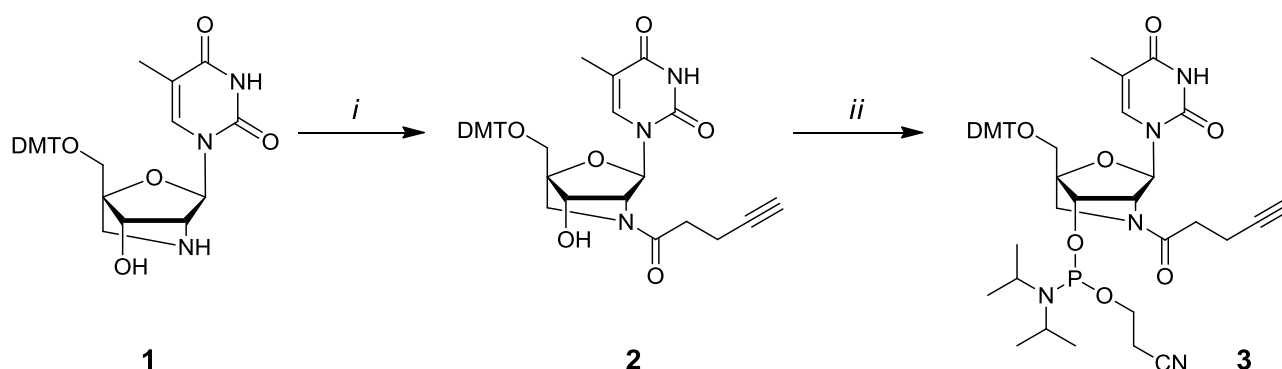

<sup>a</sup> Reagents and conditions: (i) Pent-4-ynoic acid, HATU, DIPEA, DMF, rt, 1 h, 71%; (ii) NC(CH<sub>2</sub>)<sub>2</sub>OP(N(*i*-Pr)<sub>2</sub>)<sub>2</sub>, diisopropylammonium tetrazolide, DCM, rt, 24 h, 73%. DMT = 4,4'-dimethoxytrityl.

**(1*R*,3*R*,4*R*,7*S*)-1-(4,4'-Dimethoxytrityloxymethyl)-7-hydroxy-5-(pent-4-ynoyl)-3-(thymine-1-yl)-2-oxa-5-azabicyclo[2.2.1]heptane (2).** Pent-4-ynoic acid (287 mg, 2.93 mmol) and HATU (1.11 g, 2.92 mmol) were dissolved in anhydrous DMF (12 mL). DIPEA (0.82 mL, 4.71 mmol) was added and the reaction mixture was stirred at room temperature for 10 min. A solution of nucleoside **1** (1.50 g, 2.62 mmol) in anhydrous DMF (12 mL) was added dropwise, and the reaction mixture was stirred at room temperature for 1 h. The reaction mixture was diluted with ethyl acetate (150 mL) and washed with a saturated aqueous solution of NaHCO<sub>3</sub> (2 × 475 mL) and water (6 × 50 mL). The aqueous phases were back-extracted in portions with ethyl acetate (160 mL in total). The combined organic phase was dried over Na<sub>2</sub>SO<sub>4</sub>, filtered and the solvent removed *in vacuo*. The residue was purified by silica gel column chromatography (0 – 5% MeOH/CH<sub>2</sub>Cl<sub>2</sub>) to afford a rotameric mixture (~0.65:0.35 by <sup>1</sup>H NMR) of nucleoside **2** as an off-white foam (1.21 g, 71%). *R*<sub>f</sub> 0.57 (10% MeOH/CH<sub>2</sub>Cl<sub>2</sub>); <sup>1</sup>H NMR (400 MHz, DMSO-*d*<sub>6</sub>) (subscript A = major rotamer, subscript B = minor rotamer; integrals are shown only for major rotamer) δ<sub>H</sub> 11.46 (s, 1H, NH<sub>A</sub>), 11.38 (s, NH<sub>B</sub>), 7.56 (s, H6<sub>B</sub>), 7.52 (s, H6<sub>A</sub>), 7.46 – 7.41 (m, 2H, Ar),

7.37 – 7.22 (m, 7H, Ar), 6.94 - 6.89 (m, 4H, Ar), 5.93 (d,  $J = 4.1$  Hz, 1H, 3'-OH<sub>A</sub>), 5.89 (d,  $J = 4.5$  Hz, 3'-OH<sub>B</sub>), 5.44 (s, 1H, H1'<sub>A</sub>), 5.39 (s, H1'<sub>B</sub>), 4.69 (s, H2'<sub>B</sub>), 4.41 (s, 1H, H2'<sub>A</sub>), 4.21 (m, 1H, H3'), 3.74 (s, 6H, 2 × OCH<sub>3</sub>), 3.47 – 3.28 (m, 4H, H5', H5''), 2.76 (t,  $J = 2.3$  Hz, 1H, C≡CH), 2.72 – 2.52, 2.44 – 2.35 (m, 4H, 2 × CH<sub>2</sub>), 1.49 (s, 3H, 5-Me<sub>A</sub>), 1.46 (s, 1H, 5-Me<sub>B</sub>); <sup>13</sup>C NMR (101 MHz, DMSO-*d*<sub>6</sub>) δ<sub>C</sub> 169.4, 169.3, 163.9, 163.8, 158.2, 150.0, 149.8, 144.64, 144.58, 135.32, 135.25, 135.04, 135.01, 134.1, 129.8, 129.7, 128.0, 127.7, 126.9, 113.3, 108.6, 108.5, 87.9, 87.3, 86.6, 86.2, 85.8, 85.7, 83.9, 83.8, 71.3, 71.2, 69.2, 68.2, 63.0, 60.7, 59.3, 59.2, 55.1, 51.1, 32.5, 32.0, 13.6, 13.4, 12.29, 12.25; HRMS-ESI *m/z*: 674.2454 ([M + Na]<sup>+</sup>, C<sub>37</sub>H<sub>37</sub>N<sub>3</sub>O<sub>8</sub>-Na<sup>+</sup> calcd 674.2473).

**(1*R*,3*R*,4*R*,7*S*)-7-(2-Cyanoethoxy(diisopropylamino)-phosphinoxy)-1-(4,4'-dimethoxytrityloxymethyl)-5-(pent-4-ynoyl)-3-(thymine-1-yl)-2-oxa-5-azabicyclo[2.2.1]heptane (3).**

Nucleoside **2** (176 mg, 0.27 mmol) was co-evaporated with anhydrous CH<sub>2</sub>Cl<sub>2</sub>, and subsequently mixed with *N,N*-diisopropylammonium tetrazolide (69 mg, 0.40 mmol). The solids were dissolved in anhydrous CH<sub>2</sub>Cl<sub>2</sub> (4.0 mL) and 2-cyanoethyl-*N,N,N',N'*-tetraisopropylphosphane (120 μL, 0.38 mmol) was added dropwise. The reaction mixture was stirred at room temperature for 18 h, and then additional *N,N*-diisopropylammonium tetrazolide (49 mg, 0.29 mmol) and 2-cyanoethyl-*N,N,N',N'*-tetraisopropylphosphane (90 μL, 0.28 mmol) were added and stirred for a further 5 h. Ethanol (1 mL) was added and the resulting solution stirred for 20 min. The reaction mixture was then diluted with CH<sub>2</sub>Cl<sub>2</sub> (20 mL) and washed with a saturated aqueous solution of NaHCO<sub>3</sub> (2 × 15 mL). The combined aqueous phase was back-extracted with CH<sub>2</sub>Cl<sub>2</sub> (3 × 15 mL), and the combined organic phase was dried over Na<sub>2</sub>SO<sub>4</sub>, filtered and the solvent removed *in vacuo*. The residue was purified by silica gel column chromatography (20–75% ethyl acetate/petroleum ether) giving a white foam. The foam was dissolved in ethyl acetate (1.5 mL) and the resulting solution was added dropwise to petroleum ether (150 mL). The formed precipitate was isolated affording phosphoramidite **3** as a white foam (167 mg, 73%). *R*<sub>f</sub> 0.63 (ethyl acetate); <sup>31</sup>P NMR (162 MHz, DMSO-*d*<sub>6</sub>) δ<sub>P</sub> 148.3, 147.9, 147.6, 147.0; HRMS-ESI *m/z*: 874.3528 ([M + Na]<sup>+</sup>, C<sub>46</sub>H<sub>54</sub>N<sub>5</sub>O<sub>9</sub>P-Na<sup>+</sup> calcd 874.3551).

**Figure S1.** A)  $^1\text{H}$  and B)  $^{13}\text{C}$  NMR spectra of compound **2** (400 MHz and 101 MHz,  $\text{DMSO-}d_6$ ).

A)

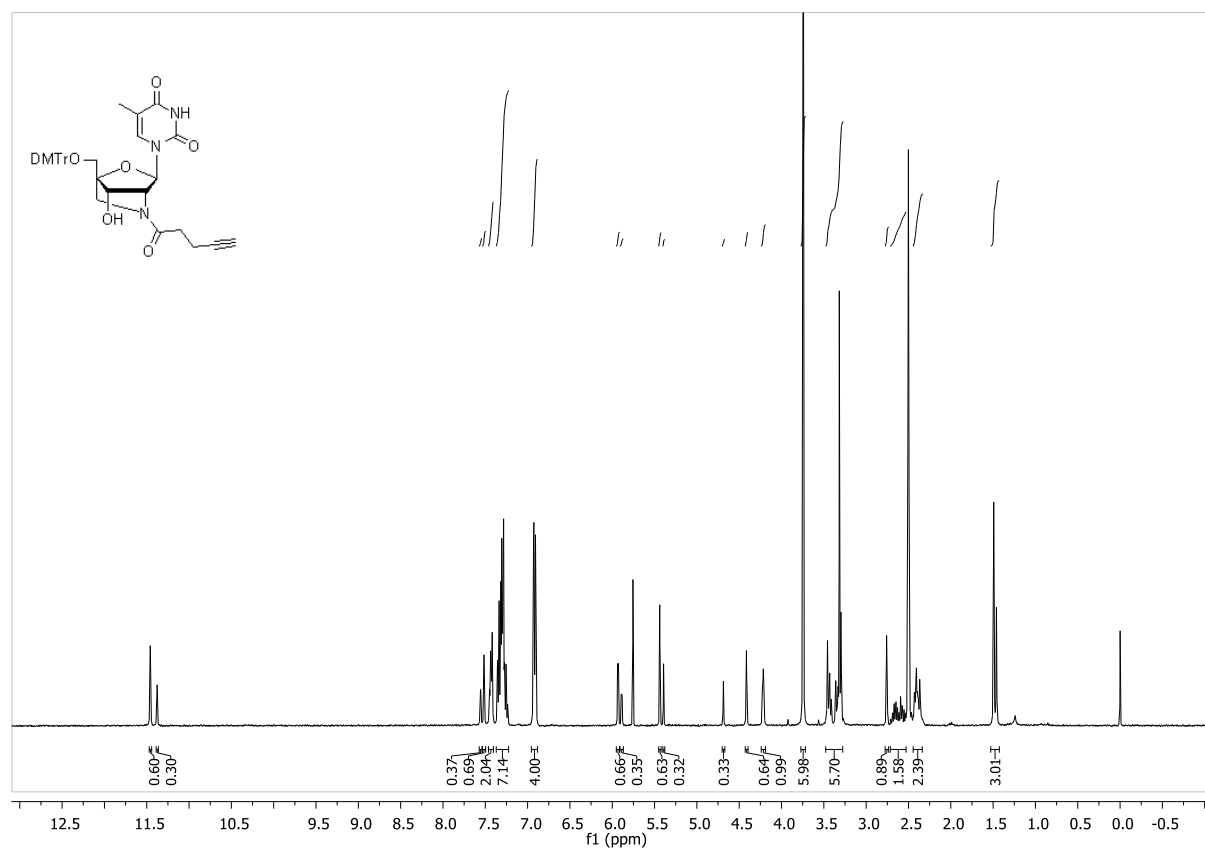

B)

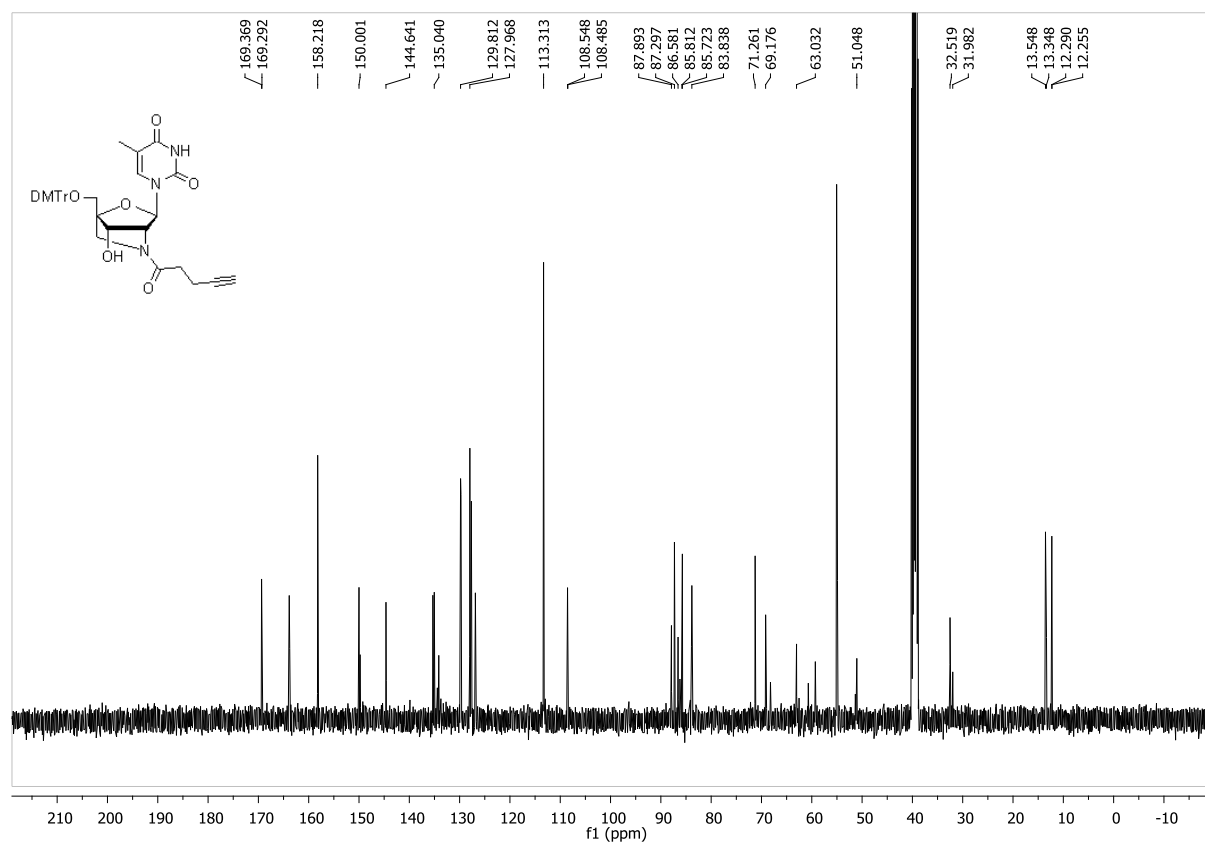

**Figure S2.** A)  $^1\text{H}$  and B)  $^{31}\text{P}$  NMR spectra of compound **3** (400 MHz and 162 MHz,  $\text{DMSO-}d_6$ ).

A)

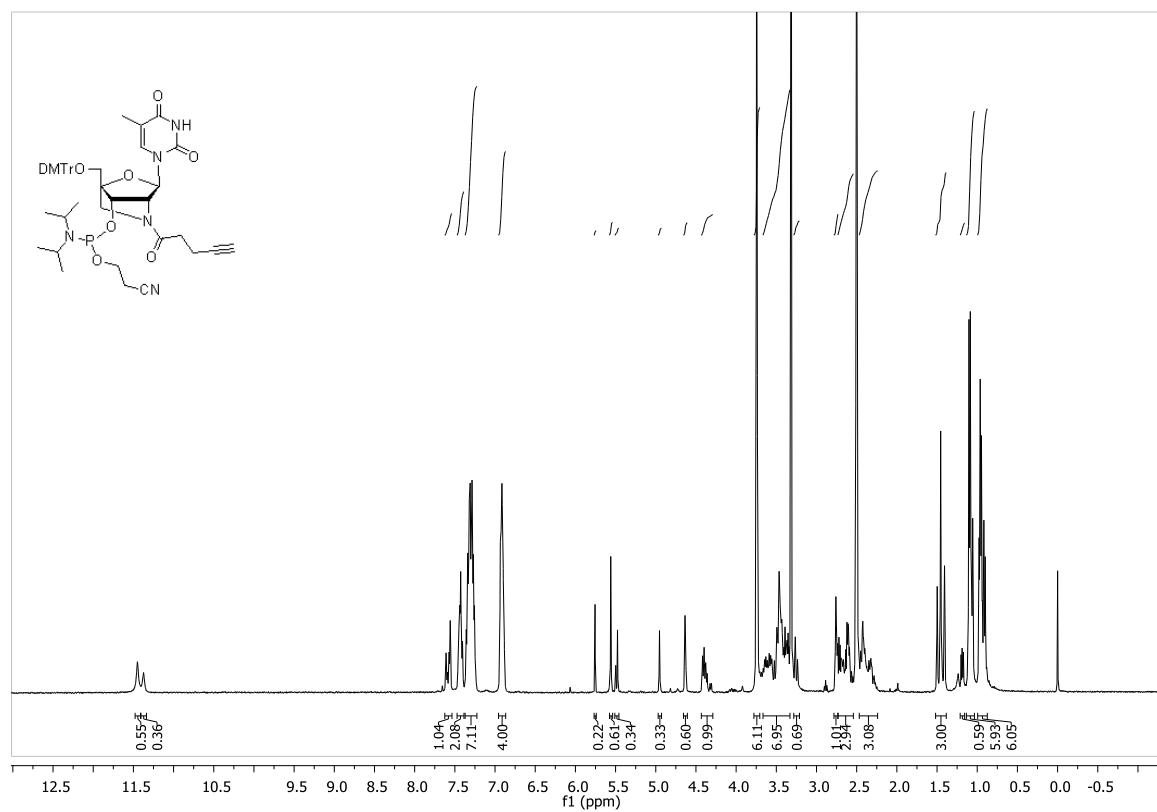

B)

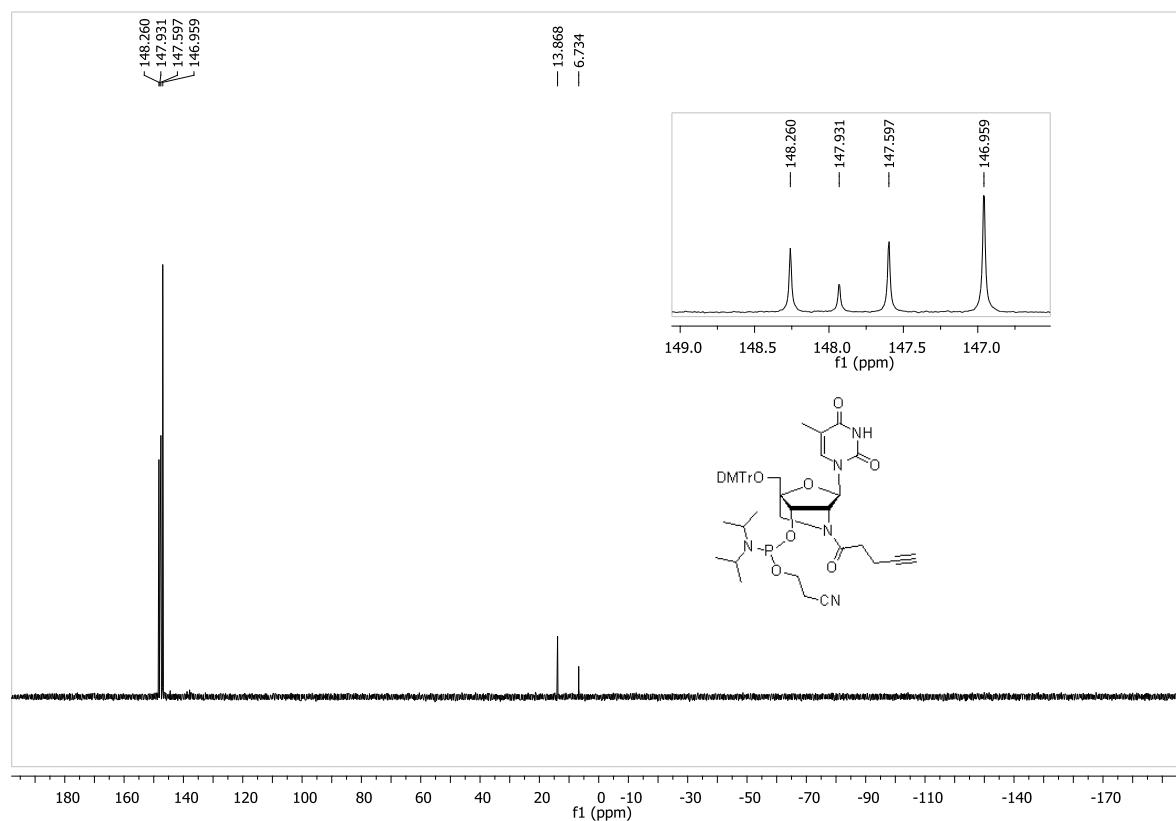

**Table S1.** Chemical structures and photophysical characteristics of single molecule dyes used in this study.<sup>a</sup>

| Dye      | Chemical structure of azide derivative                                              | $\lambda^{\text{ex}}$ , nm | $\lambda^{\text{fl}}_{\text{max}}$ , nm | $\epsilon_{\text{max}}$ at $\lambda^{\text{ex}}$ , $\text{cm}^{-1}\text{M}^{-1}$ | $\Phi_{\text{F}}$ |
|----------|-------------------------------------------------------------------------------------|----------------------------|-----------------------------------------|----------------------------------------------------------------------------------|-------------------|
| 5-R110   | 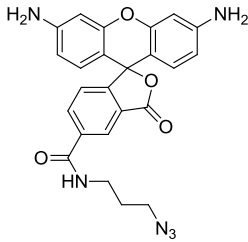   | 496                        | 520                                     | 80.000                                                                           | 0.9               |
| Cy3      |    | 546                        | 563                                     | 150.000                                                                          | 0.1               |
| Cy5      |   | 646                        | 662                                     | 250.000                                                                          | 0.2               |
| Perylene |  | 408, 436                   | 435, 463, 495                           | 28.000, 37.000                                                                   | 0.95              |
| 6-FAM    |  | 494                        | 520                                     | 75.000                                                                           | 0.9               |
| ROX      |  | 570                        | 591                                     | 82.000                                                                           | 1.0               |

<sup>a</sup> This information is available online, e.g. on web-page of fluorescent dyes supplier Lumiprobe LLC: <http://www.lumiprobe.com/>



## Post-synthetic click chemistry

Concentrations of oligonucleotides were calculated using the following extinction coefficients ( $\text{OD}_{260}/\mu\text{mol}$ ): G, 10.5; A, 13.9; T,  $\mathbf{M}^1$ , 7.9; C, 6.6;  $\mathbf{M}^2$ , 11.8;  $\mathbf{M}^3$ , 5.7;  $\mathbf{M}^4$ , 4.3;  $\mathbf{M}^5$ , 33.2.<sup>3</sup>

**General method for CuAAC reactions (monomers  $\mathbf{M}^2$ – $\mathbf{M}^4$ ).** Starting oligonucleotide **ON1–ON4** (20 nmol) was dissolved in fresh MQ water (30  $\mu\text{L}$ ) in 1.5 mL plastic eppendorf tubes. DMSO (40  $\mu\text{L}$ ), 2M triethylammonium acetate buffer (pH 7.4; 10  $\mu\text{L}$ ), corresponding azide **5–7** (6  $\mu\text{L}$  (**ON1**), 10  $\mu\text{L}$  (**ON2–ON3**) and 14  $\mu\text{L}$  (**ON4**) of 10 mM solution in DMSO), ascorbic acid (5  $\mu\text{L}$  of 25 mM freshly prepared stock solution) and Cu(II)-TBTA equimolar complex (5  $\mu\text{L}$  of 10 mM stock solution) were subsequently added. The resulting mixture was deaerated, tightly closed, mixed by vortexing and left at rt (monomer  $\mathbf{M}^2$ ; 12 h, **ON1–ON3**; 24 h, **ON4**). In case of highly hydrophobic cyanine azides **6–7** the reaction mixture was initially heated to 85 °C for 10 minutes and then left at rt for 12 h (**ON1–ON3**) or 24 h (**ON4**). The reaction was afterwards filtrated through Illustra NAP-10 column (GE Healthcare) following manufacture's protocol. The resulting solution was evaporated followed by precipitation of the product conjugates from cold acetone (-18 °C, 12 h) and subsequent washing with acetone two times. The resulting conjugates **ON5–ON16** were analysed by MALDI TOF mass spectrometry and IE HPLC (Table S2, Figures S3-S4). Final yields of products based on the absorbance at 260 nm: 85% (**ON5**), 78% (**ON6**), 80% (**ON7**), 74% (**ON8**), 63% (**ON9**), 63% (**ON10**), 63% (**ON11**), 62% (**ON12**), 64% (**ON13**), 58% (**ON14**), 60% (**ON15**), 67% (**ON16**).

**General method for microwave-assisted CuAAC reactions (monomer  $\mathbf{M}^5$ ).** Starting oligonucleotide **ON1–ON4** (20 nmol) was dissolved in fresh MQ water (30  $\mu\text{L}$ ) in 1.5 mL plastic eppendorf tubes. DMSO (40  $\mu\text{L}$ ), 2M triethylammonium acetate buffer (pH 7.4; 10  $\mu\text{L}$ ), corresponding azide **8** (6  $\mu\text{L}$  (**ON1**), 10  $\mu\text{L}$  (**ON2–ON3**) and 14  $\mu\text{L}$  (**ON4**) of 10 mM solution in DMSO), ascorbic acid (5  $\mu\text{L}$  of 25

---

<sup>3</sup> I. K. Astakhova, J. Wengel, *Chem. Eur. J.* 2013, 1112-1122.

mM freshly prepared stock solution) and Cu(II)-TBTA equimolar complex (5  $\mu$ L of 10 mM stock solution) were subsequently added. The resulting mixture was deaerated, tightly closed, mixed by vortexing and subjected to microwave conditions (microwave reactor, 60 °C, 15 minutes). The reaction was afterwards cooled to room temperature and filtrated through Illustra NAP-10 column (GE Healthcare) following manufacture's protocol. The resulting solution was evaporated followed by precipitation of the product conjugates from cold acetone (-18 °C, 12 h) and subsequent washing with acetone two times. The resulting conjugates **ON17–ON20** were analysed by MALDI TOF mass spectrometry and IE HPLC (Table S2, Figures S3-S4). Final yields of products based on the absorbance at 260 nm: 81% (**ON17**), 72% (**ON18**), 76% (**ON19**), 65% (**ON20**).

**Table S2.** IE HPLC retention times and MALDI MS of purified oligodeoxyribonucleotides.

| #           | Sequence, 5'→3'                                                    | Ret. time, min | MALDI MS                     |                              |
|-------------|--------------------------------------------------------------------|----------------|------------------------------|------------------------------|
|             |                                                                    |                | Found m/z [M+H] <sup>+</sup> | Calc. m/z [M+H] <sup>+</sup> |
| <b>ON1</b>  | TGC ACT CTA TGM <sup>1</sup> CTG TAT CAT                           | 8.88           | 6467                         | 6468                         |
| <b>ON2</b>  | TGC ACT CTA M <sup>1</sup> GT CM <sup>1</sup> G TAT CAT            | 8.91           | 6575                         | 6575                         |
| <b>ON3</b>  | TGC ACM <sup>1</sup> CTA TGT CTG TAM <sup>1</sup> CAT              | 8.90           | 6572                         | 6575                         |
| <b>ON4</b>  | TGC ACM <sup>1</sup> CTA TGM <sup>1</sup> CTG TAM <sup>1</sup> CAT | 8.91           | 6680                         | 6682                         |
| <b>ON5</b>  | TGC ACT CTA TGM <sup>2</sup> CTG TAT CAT                           | 9.10           | 6925                         | 6925                         |
| <b>ON6</b>  | TGC ACT CTA M <sup>2</sup> GT CM <sup>2</sup> G TAT CAT            | 9.13           | 7491                         | 7488                         |
| <b>ON7</b>  | TGC ACM <sup>2</sup> CTA TGT CTG TAM <sup>2</sup> CAT              | 9.13           | 7489                         | 7488                         |
| <b>ON8</b>  | TGC ACM <sup>2</sup> CTA TGM <sup>2</sup> CTG TAM <sup>2</sup> CAT | 9.34           | 8053                         | 8052                         |
| <b>ON9</b>  | TGC ACT CTA TGM <sup>3</sup> CTG TAT CAT                           | 10.00          | 7008                         | 7008                         |
| <b>ON10</b> | TGC ACT CTA M <sup>3</sup> GT CM <sup>3</sup> G TAT CAT            | 10.01          | 7657                         | 7655                         |
| <b>ON11</b> | TGC ACM <sup>3</sup> CTA TGT CTG TAM <sup>3</sup> CAT              | 10.20          | 7655                         | 7655                         |
| <b>ON12</b> | TGC ACM <sup>3</sup> CTA TGM <sup>3</sup> CTG TAM <sup>3</sup> CAT | 10.42          | 8300                         | 8302                         |
| <b>ON13</b> | TGC ACT CTA TGM <sup>4</sup> CTG TAT CAT                           | 11.40          | 7031                         | 7034                         |
| <b>ON14</b> | TGC ACT CTA M <sup>4</sup> GT CM <sup>4</sup> G TAT CAT            | 11.45          | 7707                         | 7707                         |
| <b>ON15</b> | TGC ACM <sup>4</sup> CTA TGT CTG TAM <sup>4</sup> CAT              | 11.50          | 7706                         | 7707                         |
| <b>ON16</b> | TGC ACM <sup>4</sup> CTA TGM <sup>4</sup> CTG TAM <sup>4</sup> CAT | 11.93          | 8381                         | 8379                         |
| <b>ON17</b> | TGC ACT CTA TGM <sup>5</sup> CTG TAT CAT                           | 9.11           | 6800                         | 6803                         |
| <b>ON18</b> | TGC ACT CTA M <sup>5</sup> GT CM <sup>5</sup> G TAT CAT            | 9.11           | 7242                         | 7245                         |
| <b>ON19</b> | TGC ACM <sup>5</sup> CTA TGT CTG TAM <sup>5</sup> CAT              | 9.20           | 7244                         | 7245                         |
| <b>ON20</b> | TGC ACM <sup>5</sup> CTA TGM <sup>5</sup> CTG TAM <sup>5</sup> CAT | 9.39           | 7688                         | 7687                         |

**Figure S3. Representative IE HPLC of modified oligonucleotides.**

**ON2**

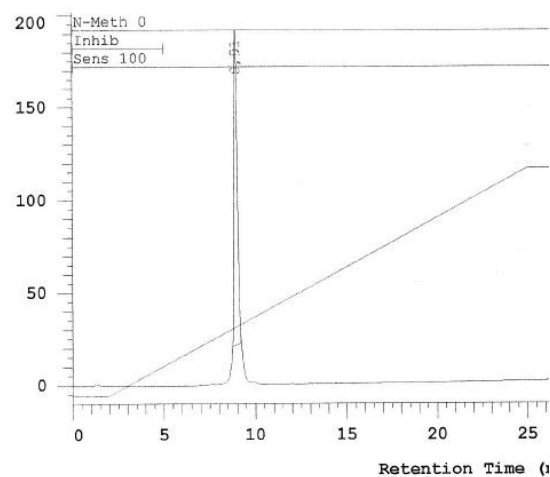

**ON6**

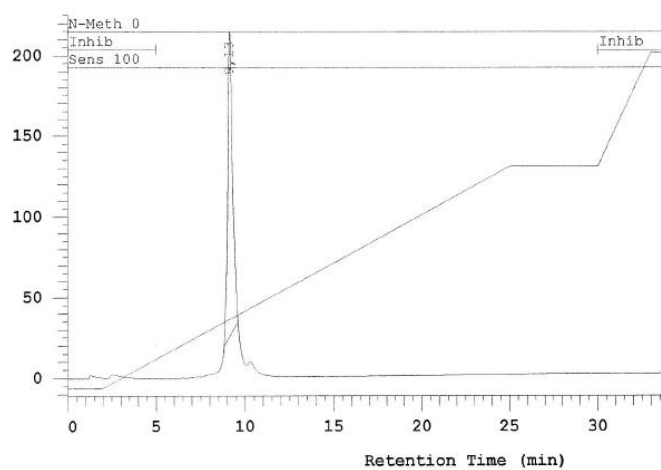

**ON10**

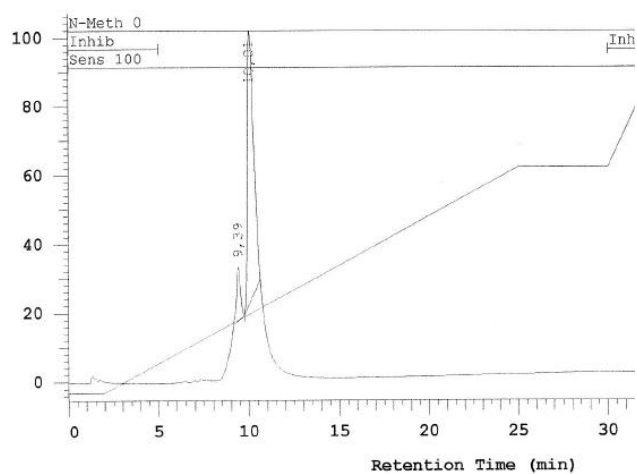

**Figure S4. Representative MALDI-MS spectra of modified oligonucleotide ON6.**

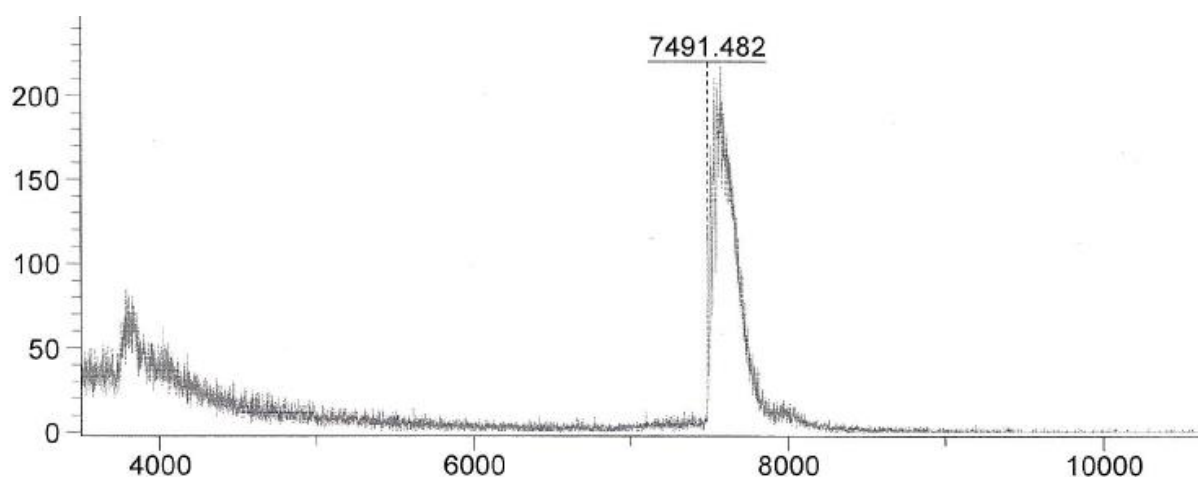

#### **UV-visible absorbance and thermal denaturation studies**

UV-visible absorbance spectra and thermal denaturation experiments were performed on a Beckman Coulter DU800 UV/VIS Spectrophotometer equipped with Beckman Coulter High Performance Temperature Controller in a medium salt phosphate buffer (100 mM NaCl, 10 mM Na-phosphate, 0.1 mM EDTA, pH 7.0). Concentrations of oligonucleotides were calculated using the extinction coefficients listed above. Annealing steps were performed on Eppendorf Thermomixer Shaker equipped with a 0.5 mL block. Oligonucleotides (1.0  $\mu$ M each strand) were thoroughly mixed, denaturated by heating for 5 min at 85  $^{\circ}$ C and subsequently cooled to the starting temperature of experiment. Thermal denaturation temperatures ( $T_m$  values,  $^{\circ}$ C) were determined as the maximum of the first derivative of the thermal denaturation curve ( $A$  vs. temperature). Reported  $T_m$  values are an average of at least two measurements within  $\pm 0.5$   $^{\circ}$ C.

**Table S3.**  $T_m$  values of the modified duplexes containing monomers  $M^2-M^5$  compared to corresponding  $M^1$ -labelled references.<sup>a</sup>

| ON#  | Sequence, 5'→3'                                                    | $\Delta T_m, ^\circ C^*$ |      |
|------|--------------------------------------------------------------------|--------------------------|------|
|      |                                                                    | DNA                      | RNA  |
| ON5  | TGC ACT CTA TGM <sup>2</sup> CTG TAT CAT                           | -3.0                     | -3.0 |
| ON6  | TGC ACT CTA M <sup>2</sup> GT CM <sup>2</sup> G TAT CAT            | -3.5                     | -3.0 |
| ON7  | TGC ACM <sup>2</sup> CTA TGT CTG TAM <sup>2</sup> CAT              | -5.5                     | -4.0 |
| ON8  | TGC ACM <sup>2</sup> CTA TGM <sup>2</sup> CTG TAM <sup>2</sup> CAT | -7.0                     | -5.0 |
| ON9  | TGC ACT CTA TGM <sup>3</sup> CTG TAT CAT                           | 0.0                      | -2.0 |
| ON10 | TGC ACT CTA M <sup>3</sup> GT CM <sup>3</sup> G TAT CAT            | -0.5                     | -3.0 |
| ON11 | TGC ACM <sup>3</sup> CTA TGT CTG TAM <sup>3</sup> CAT              | 0.0                      | -3.0 |
| ON12 | TGC ACM <sup>3</sup> CTA TGM <sup>3</sup> CTG TAM <sup>3</sup> CAT | 0.0                      | -4.5 |
| ON13 | TGC ACT CTA TGM <sup>4</sup> CTG TAT CAT                           | 0.0                      | -2.0 |
| ON14 | TGC ACT CTA M <sup>4</sup> GT CM <sup>4</sup> G TAT CAT            | +1.5                     | -4.0 |
| ON15 | TGC ACM <sup>4</sup> CTA TGT CTG TAM <sup>4</sup> CAT              | 0.0                      | -3.5 |
| ON16 | TGC ACM <sup>4</sup> CTA TGM <sup>4</sup> CTG TAM <sup>4</sup> CAT | 0.0                      | -5.5 |
| ON17 | TGC ACT CTA TGM <sup>5</sup> CTG TAT CAT                           | +4.0                     | 0.0  |
| ON18 | TGC ACT CTA M <sup>5</sup> GT CM <sup>5</sup> G TAT CAT            | +6.5                     | -9.0 |
| ON19 | TGC ACM <sup>5</sup> CTA TGT CTG TAM <sup>5</sup> CAT              | +4.0                     | -1.0 |
| ON20 | TGC ACM <sup>5</sup> CTA TGM <sup>5</sup> CTG TAM <sup>5</sup> CAT | +7.0                     | -1.0 |

<sup>a</sup> Thermal denaturation temperatures in a medium salt phosphate buffer  $T_m$  ( $^\circ C$ ) measured as the maximum of the first derivatives of the melting curves ( $A$  vs temperature). Reported  $T_m$  values are averages of at least two measurements with resulting  $T_m \pm 0.5$   $^\circ C$ . \*  $\Delta T_m = T_m$  (duplex containing monomer  $M^2-M^5$ ) -  $T_m$  (corresponding  $M^1$ -labelled reference).

**Table S4.** Effect of single-nucleotide mismatch on binding affinity and fluorescence sensing of DNA/RNA targets by **ON7** and **ON19** in a medium salt buffer.<sup>a</sup>

| Probe: Target DNA/RNA <sup>a</sup>                         | $T_m/^{\circ}\text{C}$ |                    |       |       |                    |                    |       |       |                    |
|------------------------------------------------------------|------------------------|--------------------|-------|-------|--------------------|--------------------|-------|-------|--------------------|
|                                                            | $(I^0/I)^*$            |                    |       |       |                    |                    |       |       |                    |
|                                                            | DNA target             |                    |       |       |                    | RNA target         |       |       |                    |
|                                                            | X                      | A                  | C     | T     | G                  | A                  | C     | U     | G                  |
| <b>Probe ON7</b>                                           |                        |                    |       |       |                    |                    |       |       |                    |
| 5' - TGC ACM <sup>2</sup> CTA TGT CTG TAM <sup>2</sup> CAT |                        | 47.0               | 46.0  | 44.0  | 58.0 <sup>cc</sup> | 50.0               | 51.0  | 54.0  | 64.0 <sup>cc</sup> |
| 3' - ACG TGA GAT ACA GAC ATA XTA                           |                        | (4.4)              | (4.1) | (3.4) |                    | (6.3)              | (4.0) | (3.7) |                    |
| 5' - TGC ACM <sup>2</sup> CTA TGT CTG TAM <sup>2</sup> CAT |                        | 58.0 <sup>cc</sup> | 50.0  | 48.5  | 45.0               | 64.0 <sup>cc</sup> | 55.0  | 51.0  | 56.0               |
| 3' - ACG TGA GAT ACA GAC ATX GTA                           |                        |                    | (1.9) | (2.1) | (3.5)              |                    | (2.3) | (2.0) | (4.4)              |
| 5' - TGC ACM <sup>2</sup> CTA TGT CTG TAM <sup>2</sup> CAT |                        | 58.0 <sup>cc</sup> | 45.0  | n.t.  | 47.0               | 64.0 <sup>cc</sup> | 51.0  | 52.5  | 54.0               |
| 3' - ACG TGA GAT ACX GAC ATA GTA                           |                        |                    | (3.4) | (4.3) | (5.5)              |                    | (3.5) | (3.6) | (5.8)              |
| <b>Probe ON19</b>                                          |                        |                    |       |       |                    |                    |       |       |                    |
| 5' - TGC ACM <sup>5</sup> CTA TGT CTG TAM <sup>5</sup> CAT |                        | 63.0               | 59.5  | 55.0  | 67.0 <sup>cc</sup> | 60.0               | 58.0  | 55.0  | 67.0 <sup>cc</sup> |
| 3' - ACG TGA GAT ACA GAC ATA XTA                           |                        | (5.6)              | (5.5) | (3.9) |                    | (8.1)              | (5.8) | (5.2) |                    |
| 5' - TGC ACM <sup>5</sup> CTA TGT CTG TAM <sup>5</sup> CAT |                        | 67.0 <sup>cc</sup> | 56.0  | 52.0  | 54.0               | 67.0 <sup>cc</sup> | 53.0  | 52.5  | 49.0               |
| 3' - ACG TGA GAT ACA GAC ATX GTA                           |                        |                    | (4.5) | (6.2) | (9.1)              |                    | (5.6) | (7.8) | (9.9)              |
| 5' - TGC ACM <sup>5</sup> CTA TGT CTG TAM <sup>5</sup> CAT |                        | 67.0 <sup>cc</sup> | 55.0  | 52.0  | 52.5               | 67.0 <sup>cc</sup> | 53.0  | n.t.  | 54.0               |
| 3' - ACG TGA GAT ACX GAC ATA GTA                           |                        |                    | (5.2) | (4.5) | (6.0)              |                    | (4.8) | (5.0) | (7.9)              |

<sup>a</sup> Sequences of DNA target variants are displayed; cc = complementary complex; n. t. = no clear transition detected.  $T_m$  values measured using 0.5  $\mu\text{M}$  concentration of complementary strands.

\* $I^0/I$  = a ratio of fluorescence intensity of fully complementary to mismatched complex, respectively. Fluorescence intensity values were obtained as described below using 1.0  $\mu\text{M}$  LNA/DNA probes, excitation wavelengths of 500 nm (**ON7**) and 425 nm (**ON19**), and monitoring emission at 530 nm and 458 nm, respectively.

**Table S5.**  $T_m$  values of the modified duplexes containing monomers  $M^2$ – $M^5$  measured at the fluorophores' absorbance wavelength.<sup>a</sup>

| ON#  | Sequence, 5'→3'                                                    | $T_m$ , °C |       |
|------|--------------------------------------------------------------------|------------|-------|
|      |                                                                    | DNA        | RNA   |
| ON5  | TGC ACT CTA TGM <sup>2</sup> CTG TAT CAT                           | 58.5       | 62.0  |
| ON6  | TGC ACT CTA M <sup>2</sup> GT CM <sup>2</sup> G TAT CAT            | 60.0       | 66.0  |
| ON7  | TGC ACM <sup>2</sup> CTA TGT CTG TAM <sup>2</sup> CAT              | 59.0       | 64.0  |
| ON8  | TGC ACM <sup>2</sup> CTA TGM <sup>2</sup> CTG TAM <sup>2</sup> CAT | 57.0       | 65.0  |
| ON9  | TGC ACT CTA TGM <sup>3</sup> CTG TAT CAT                           | 62.0       | 63.0  |
| ON10 | TGC ACT CTA M <sup>3</sup> GT CM <sup>3</sup> G TAT CAT            | 63.0       | 65.5  |
| ON11 | TGC ACM <sup>3</sup> CTA TGT CTG TAM <sup>3</sup> CAT              | 62.0       | 65.0  |
| ON12 | TGC ACM <sup>3</sup> CTA TGM <sup>3</sup> CTG TAM <sup>3</sup> CAT | 65.0       | 65.0  |
| ON13 | TGC ACT CTA TGM <sup>4</sup> CTG TAT CAT                           | 62.0       | 63.0  |
| ON14 | TGC ACT CTA M <sup>4</sup> GT CM <sup>4</sup> G TAT CAT            | 63.0       | 64.0  |
| ON15 | TGC ACM <sup>4</sup> CTA TGT CTG TAM <sup>4</sup> CAT              | 63.0       | 64.0  |
| ON16 | TGC ACM <sup>4</sup> CTA TGM <sup>4</sup> CTG TAM <sup>4</sup> CAT | 65.0       | 64.5  |
| ON17 | TGC ACT CTA TGM <sup>5</sup> CTG TAT CAT                           | 65.5       | 65.0  |
| ON18 | TGC ACT CTA M <sup>5</sup> GT CM <sup>5</sup> G TAT CAT            | n.t.*      | n.t.  |
| ON19 | TGC ACM <sup>5</sup> CTA TGT CTG TAM <sup>5</sup> CAT              | 67.0       | n. t. |
| ON20 | TGC ACM <sup>5</sup> CTA TGM <sup>5</sup> CTG TAM <sup>5</sup> CAT | 72.0       | 70.0  |

<sup>a</sup> Thermal denaturation temperatures in a medium salt phosphate buffer  $T_m$  (°C) measured as the maximum of the first derivatives of the melting curves ( $A$  vs temperature). The fluorophore's absorbance wavelength used in this study:  $M^2$ , 503 nm;  $M^3$ , 548 nm;  $M^4$ , 645 nm;  $M^5$ , 450 nm. Reported  $T_m$  values are averages of at least two measurements with resulting  $T_m \pm 0.5$  °C. \* n.t. = no transition detected.



**Figure S5. Ratio I/II of absorbance maxima of modified oligonucleotides and duplexes.**

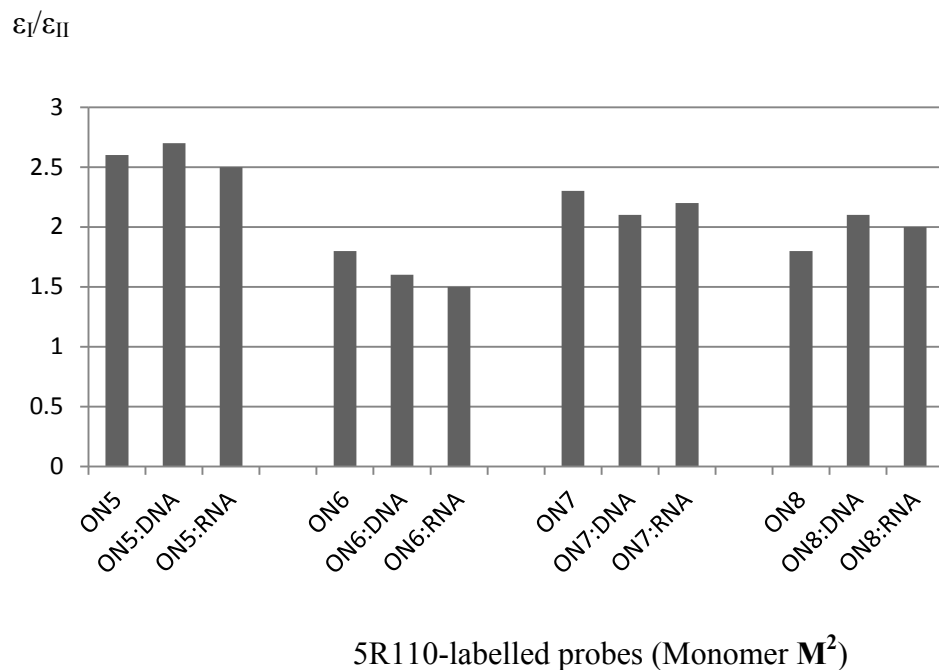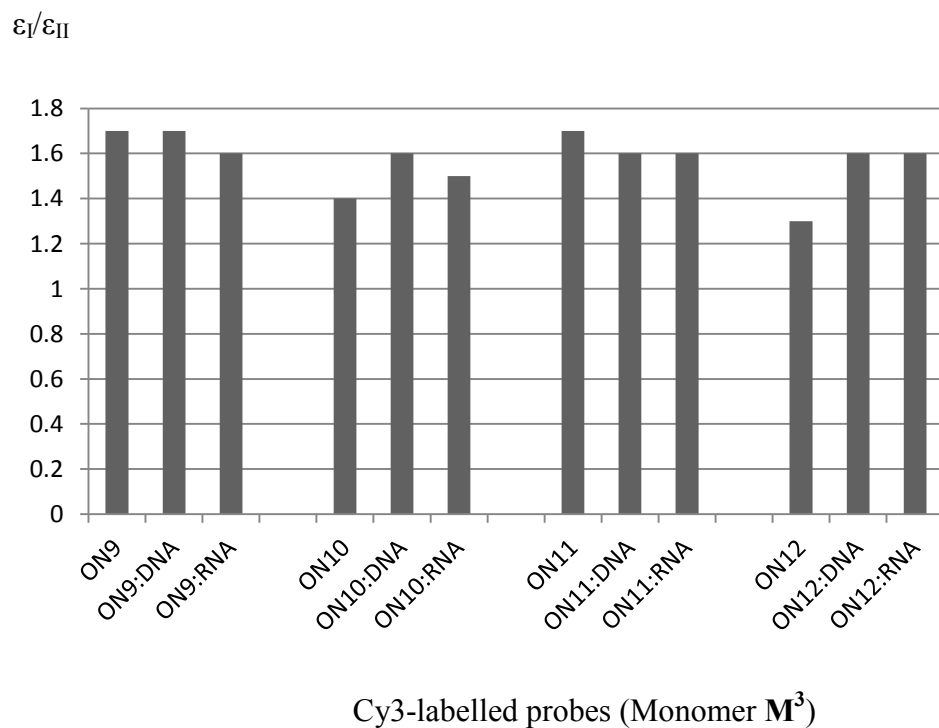

$\epsilon_I/\epsilon_{II}$

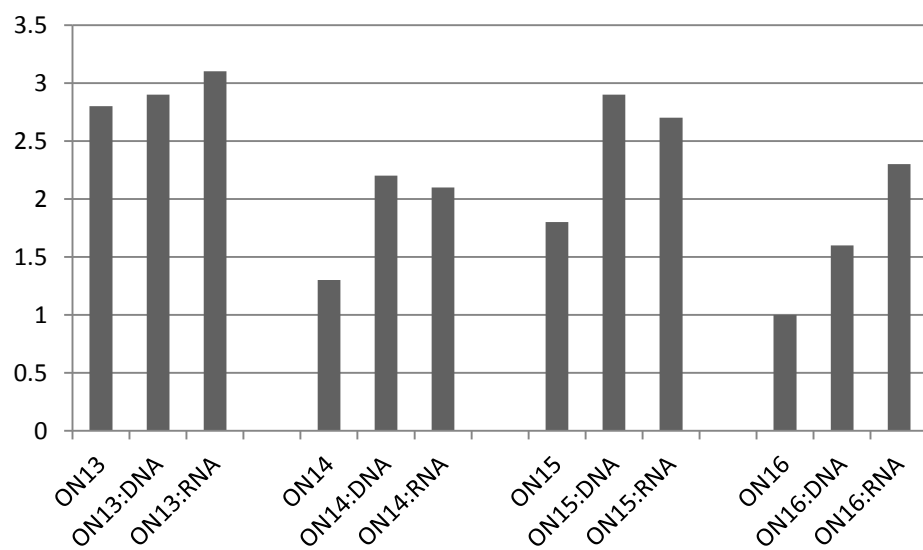

Cy5-labelled probes (Monomer  $M^4$ )

$\epsilon_I/\epsilon_{II}$

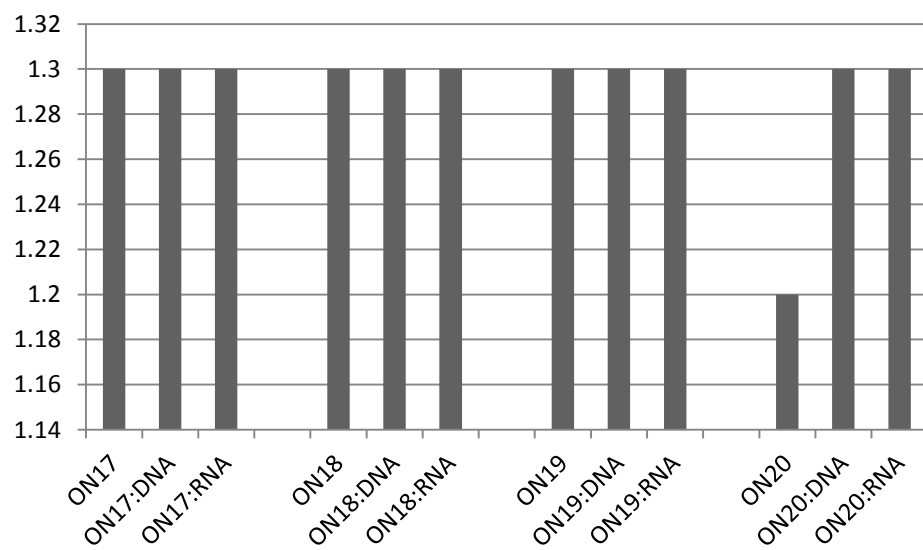

Perylene-labelled probes (Monomer  $M^5$ )

## Fluorescence studies

Fluorescence spectra were obtained in the medium salt buffer using a PerkinElmer LS 55 luminescence spectrometer equipped with a Peltier Temperature Programmer. For recording of fluorescence spectra, an excitation wavelength of 500 nm (**M**<sup>2</sup>), 545 nm (**M**<sup>3</sup>), 645 nm (**M**<sup>4</sup>), 425 nm (**M**<sup>5</sup>), and 0.25–1.0 μM concentrations of the oligonucleotides were used.

Quantum yields  $\Phi_F$  were determined by a relative method following described procedure.<sup>4</sup> Quantum yields of fluorescent probes containing monomers **M**<sup>2</sup> and **M**<sup>5</sup> were determined using highly diluted solutions of 9,10-diphenylanthracene and perylene in cyclohexane. Quantum yields of fluorescent probes containing monomers **M**<sup>3</sup>–**M**<sup>4</sup> were determined using highly diluted solutions of crezyl violet perchlorate and oxazine 170 in ethanol and methanol, respectively. Selected excitation wavelengths for quantum yield measurements: 480 nm (**M**<sup>2</sup>), 515 nm (**M**<sup>3</sup>), 600 nm (**M**<sup>4</sup>), 425 nm (**M**<sup>5</sup>) which correspond to excitation maxima of the probes (data not shown).

Fluorescence brightness (FB) values were calculated using equation:

$$FB = \epsilon_{\max} \times \Phi_F,$$

Where  $\epsilon_{\max}$  is the maximal molar extinction coefficient of the probe and  $\Phi_F$  is the corresponding fluorescence quantum yield.

---

<sup>4</sup> J. R. Lakowicz, *Principles of Fluorescence Spectroscopy*, 3th. Ed., Springer, Singapore, **2006**.

<sup>5</sup> D. Lindegaard, A. S. Madsen, I. V. Astakhova, A. D. Malakhov, B. R. Babu, V. A. Korshun, J. Wengel, *Bioorg. Med. Chem.*, 2008, **16**, 94.

**Table S6.** Spectroscopic and photophysical properties of modified single-stranded probes (SSP) and duplexes.

| #    | $\lambda_{\text{max}}^{\text{abs}}$ ,<br><br>bands I, II<br><br>(nm) |               |          | $\lambda_{\text{max}}^{\text{fl}}$<br><br>(nm) |               |         | $\Phi_{\text{F}}$ |               |      | FB          |               |     |
|------|----------------------------------------------------------------------|---------------|----------|------------------------------------------------|---------------|---------|-------------------|---------------|------|-------------|---------------|-----|
|      | Duplex with                                                          |               |          | Duplex with                                    |               |         | Duplex with       |               |      | Duplex with |               |     |
|      | SSP                                                                  | complementary |          | SSP                                            | complementary |         | SSP               | complementary |      | SSP         | complementary |     |
|      |                                                                      | DNA           | RNA      |                                                | DNA           | RNA     |                   | DNA           | RNA  |             | DNA           | RNA |
| ON5  | 510, 475                                                             | 503, 473      | 503, 473 | 528                                            | 525           | 525     | 0.21              | 0.33          | 0.42 | 14          | 24            | 30  |
| ON6  | 511, 480                                                             | 503, 478      | 503, 478 | 526                                            | 525           | 525     | 0.16              | 0.20          | 0.25 | 19          | 23            | 29  |
| ON7  | 510, 480                                                             | 507, 476      | 504, 480 | 530                                            | 530           | 526     | 0.15              | 0.42          | 0.45 | 20          | 50            | 56  |
| ON8  | 513, 480                                                             | 507, 474      | 504, 477 | 530                                            | 529           | 527     | 0.05              | 0.22          | 0.41 | 8           | 39            | 77  |
| ON9  | 550, 517                                                             | 548, 516      | 547, 516 | 562                                            | 562           | 560     | 0.10              | 0.11          | 0.10 | 22          | 23            | 12  |
| ON10 | 550, 517                                                             | 548, 516      | 548, 516 | 563                                            | 560           | 560     | 0.06              | 0.10          | 0.05 | 11          | 22            | 11  |
| ON11 | 550, 516                                                             | 548, 516      | 548, 516 | 562                                            | 560           | 560     | 0.05              | 0.04          | 0.04 | 9           | 9             | 9   |
| ON12 | 550, 514                                                             | 549, 515      | 546, 515 | 565                                            | 561           | 558     | 0.01              | 0.02          | 0.01 | 2           | 5             | 3   |
| ON13 | 647, 603                                                             | 650, 605      | 643, 600 | 662                                            | 661           | 658     | 0.01              | 0.01          | 0.01 | 2           | 2             | 2   |
| ON14 | 646, 600                                                             | 646, 601      | 644, 601 | 660                                            | 659           | 660     | 0.01              | 0.01          | 0.01 | 3           | 3             | 3   |
| ON15 | 646, 600                                                             | 646, 601      | 645, 601 | 659                                            | 659           | 659     | 0.01              | 0.01          | 0.01 | 1           | 2             | 2   |
| ON16 | 646, 599                                                             | 646, 599      | 644, 599 | 659                                            | 659           | 659     | 0.01              | 0.01          | 0.01 | 1           | 2             | 3   |
| ON17 | 451, 424                                                             | 452, 426      | 452, 426 | 487,457                                        | 487,458       | 487,458 | 0.89              | 1.00          | 1.00 | 22          | 26            | 24  |
| ON18 | 451, 424                                                             | 452, 424      | 452, 424 | 487,456                                        | 488,458       | 488,458 | 0.95              | 1.00          | 1.00 | 50          | 60            | 56  |
| ON19 | 451, 424                                                             | 451, 424      | 451, 424 | 489,457                                        | 489,457       | 489,457 | 0.84              | 1.00          | 1.00 | 49          | 69            | 58  |
| ON20 | 452, 424                                                             | 454, 424      | 452, 454 | 488,459                                        | 487,458       | 487,458 | 0.54              | 0.91          | 0.91 | 41          | 80            | 71  |

**Figure S6. Representative fluorescence spectra of the modified oligonucleotides and duplexes.**

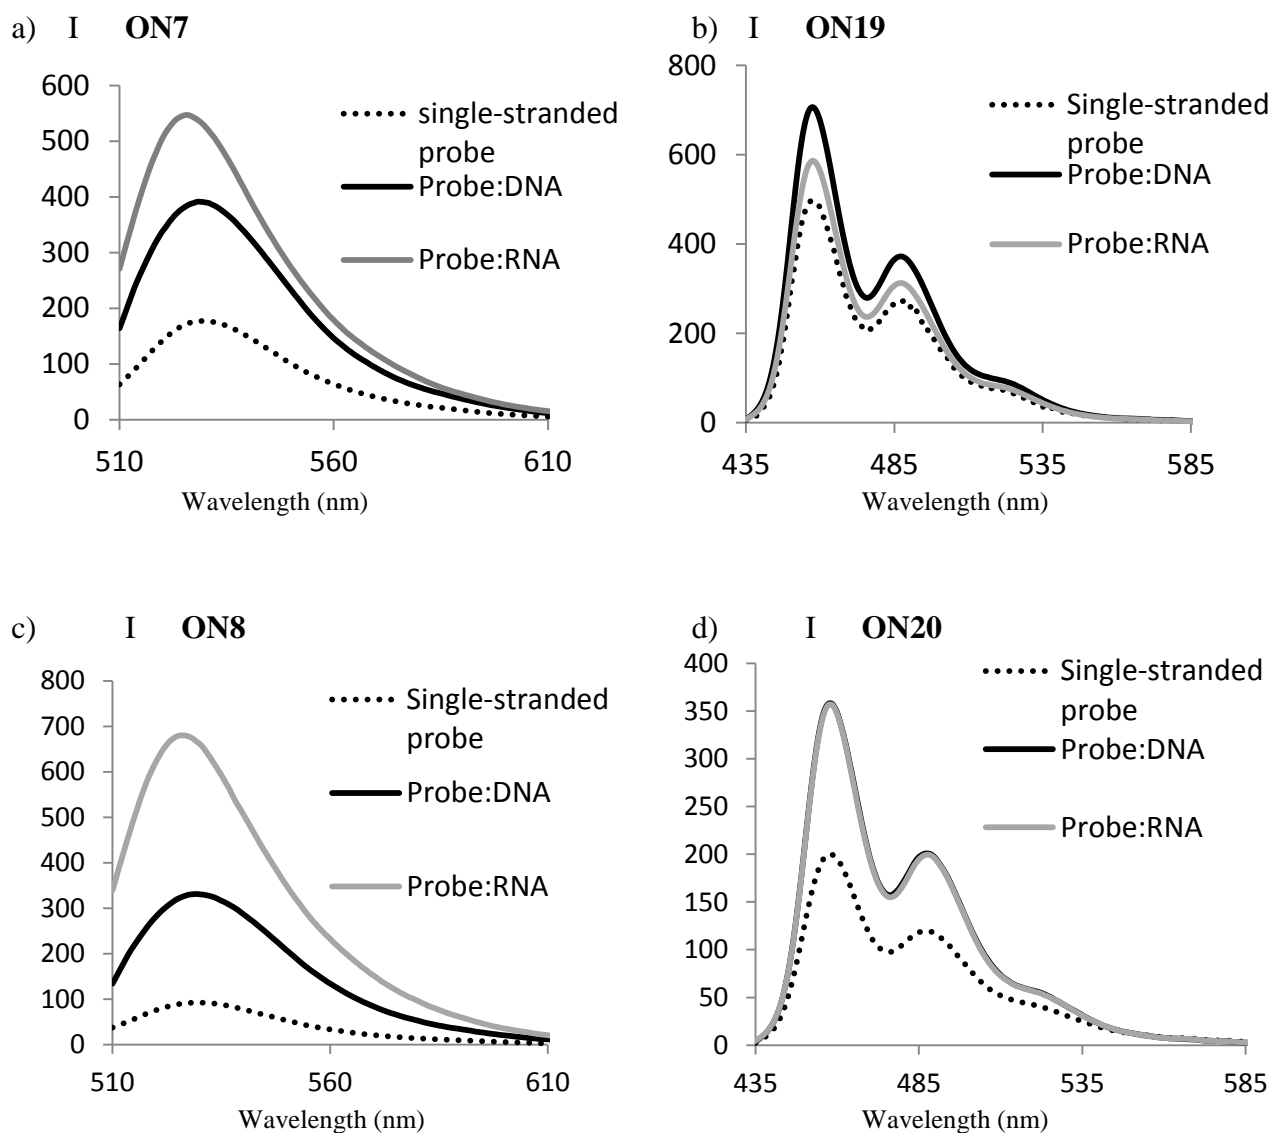

Steady-state fluorescence emission spectra of single-stranded probes **ON7** (A), **ON19** (B), **ON8** (C) and **ON20** (D) and their duplexes with complementary DNA/RNA. Spectra were obtained in a medium salt buffer at 19 °C using  $\lambda^{\text{ex}} = 500$  nm (A, C), 425 nm (B, D), and 1.0  $\mu\text{M}$  concentrations of oligonucleotides.

\* For the duplexes of **ON20** with complementary DNA/RNA the curves are superimposed.

## Autoantibody binding assay

### General

The human monoclonal autoantibodies were purchased from Diarect AG (dsDNA-mAb32 and dsDNA-mAb33 correspond to clones 32.B9 and 33. H11, respectively).<sup>6</sup> BSA, human IgG1 kappa and human IgG3 kappa used as reference proteins<sup>7</sup> were obtained from Sigma-Aldrich and dissolved in a medium salt phosphate buffer (pH 7.4) at concentrations 1.0 mg/mL.

### Incubation and Analysis

To a solution of corresponding nucleic acid complex prepared as described above in a plastic 1.5 mL tube (500  $\mu$ L 0.5  $\mu$ M),  $0.5 \times 10^5$  IU of the target autoantibody was added (53  $\mu$ L, dsDNA-mAb32  $9.4 \times 10^5$  IU/mL at a protein concentration 0.43 mg/mL; 128  $\mu$ L, dsDNA-mAb33  $3.9 \times 10^5$  IU/mL at a protein concentration 0.70 mg/mL).<sup>8</sup> As a reference, 50  $\mu$ L of the BSA, IgG1 or IgG3 stock solution was used in similar incubation reactions with the probes. Incubation was performed on Eppendorf Thermomixer Shaker (400 rpm) at 37 °C for 3 h. Upon cooling to ambient temperature over 4 h, the resulting solutions were analysed by fluorescence spectroscopy using excitation wavelength 500 nm and monitoring fluorescence at 530 nm.

**Limit of target detection (LOD) values** were determined by series of incubations and subsequent analysis of dsDNA-mAb33 at concentrations ( $\times 10^5$ ): 1 IU/mL, 0.5 IU/mL, 0.25 IU/mL, 0.1 IU/mL, 0.05 IU/mL, 0.01 IU/mL, and ON7:DNA at concentration 0.5  $\mu$ M as described above. Fluorescence intensities were measured at  $\lambda^{fl} = 530$  nm. Resulting target titration curve revealed  $LOD < 2.5 \times 10^3$  IU/mL, corresponding to the autoantibody concentration  $< 4.6$   $\mu$ g/mL (Figure S7).

---

<sup>6</sup> T. H. Winkler, S. Jahn, J. R. Kalden, *Clin. Exp. Immunol.*, 1991, **21**, 1019.

<sup>7</sup> Y. Zhanga, X. Sun, *Chem. Commun.* 2011, **47**, 3927.

<sup>8</sup> Concentrations of the autoantibodies were determined by ELISA. Chosen concentrations correspond to averaged of the total serum protein (K. D. Pagana, T. J. Pagana 2010, *Mosby's Manual of Diagnostic and Laboratory Tests*, 4th ed. St. Louis: Mosby Elsevier). Other literature consulted for the performed study: a) C. C. Chernecky, B. J. Berger, *Laboratory Tests and Diagnostic Procedures*, 2008, 5th ed. St. Louis: Saunders; b) *Handbook of Diagnostic Tests*, 2003, 3rd ed. Philadelphia: Lippincott Williams and Wilkins.

**Table S7. Fluorescence detection of antibody binding by single-stranded oligonucleotides and duplexes containing monomer M<sup>2</sup>.**

| Target             | Probe:    | Fluorescence intensity at 530 nm |             |             |       |             |             |
|--------------------|-----------|----------------------------------|-------------|-------------|-------|-------------|-------------|
|                    |           | ssON7                            | ON7:<br>DNA | ON7:<br>RNA | ssON8 | ON8:<br>DNA | ON8:<br>RNA |
| -                  |           | 83                               | 122         | 148         | 35    | 73          | 176         |
| <b>dsDNA-mAb32</b> | <i>0*</i> |                                  |             |             |       |             |             |
|                    |           | 34                               | 166         | 208         | 19    | 129         | 249         |
| <b>dsDNA-mAb33</b> | <i>0*</i> |                                  |             |             |       |             |             |
|                    |           | 71                               | 690         | 242         | 36    | 120         | 291         |
| <b>BSA</b>         | <i>0*</i> |                                  |             |             |       |             |             |
|                    |           | 98                               | 171         | 256         | 26    | 110         | 218         |
| <b>IgG1</b>        | <i>0*</i> |                                  |             |             |       |             |             |
|                    |           | 90                               | 120         | 132         | 21    | 84          | 165         |
| <b>IgG3</b>        | <i>0*</i> |                                  |             |             |       |             |             |
|                    |           | 100                              | 110         | 120         | 20    | 65          | 153         |

\* No fluorescence signal observed for proteins at  $\lambda^{\text{fl}}$  530 nm.

## Molecular modeling of the interactions between fluorescent probes and proteins used in this study

Duplexes were built in A/B-type helical geometry using Chem3D Pro 12.0 for incorporation of fluorophores and further analysed by MacroModel V9.1.<sup>9</sup> When doing this the structures were minimized using the Polak–Ribiere conjugate gradient method, the all-atom AMBER force field<sup>10</sup>, and GB/SA solvation model<sup>11</sup> as implemented in MacroModel V9.1. Non-bonded interactions were treated with extended cut-offs (van der Waals 8.0 Å and electrostatics 20.0 Å). Interaction of the minimized duplex structures with target proteins were studied using Swiss-Pdb Viewer 4.1.0. Structures of the autoantibodies and BSA were imported from Pdb bank and used in building of models without modification.<sup>12</sup> The modeling of protein–nucleic acid interactions was performed assuming 1:1 Langmuir autoantibody–DNA binding model implied recently by surface plasmon resonance (SPR) studies.<sup>13</sup> Resulting structures were additionally illustrated in PyMOL Molecular Graphics System.

---

<sup>9</sup> MacroModel, version 9.1, Schrödinger, 2005, LLC, New York, NY.

<sup>10</sup> S. J. Weiner, P. A. Kollman, D. A. Case, U. C. Singh, C. Ghio, G. Alagona, S. Profeta, P. J. Weiner, *J. Am. Chem. Soc.*, 1984, **106**, 765.

<sup>11</sup> S. J. Weiner, P. A. Kollman, D. T. Nguen, D. A. Case, *J. Comput. Chem.*, 1986, **7**, 230.

<sup>12</sup> 64M-2 antibody Fab fragment (used in Figure S8 A,C): H. Yokoyama et. al., *Acta Crystallogr., Sect.D*, 2012, **68**, 232. ED-10 Autoantibody: S. Sanguineti et al., *J. Mol. Biol.* 2007, **370**, 183 (Figure S8 B). BSA: A. Bujacz, G. Bujacz, *Acta Crystallogr.,Sect.D*, 2012, **68**, 1278 (Figure S8 D).

<sup>13</sup> A. Buhl et al., *Biosens. Bioelectron.*, 2009, **25**, 198.



**Figure S7. Molecular modeling of interactions between fluorescent nucleic acid complexes and proteins used in this study.**

a) **ON8:DNA – BSA**

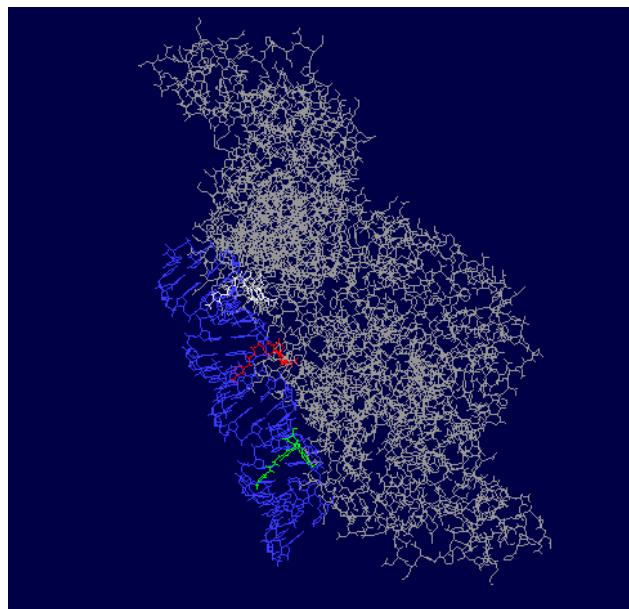

b) **ON7:DNA – mAb33**

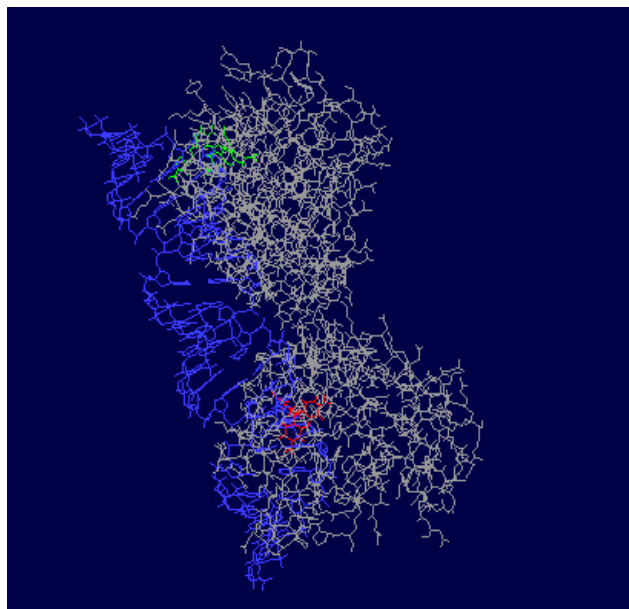

c) **ON7:DNA – mAb32**

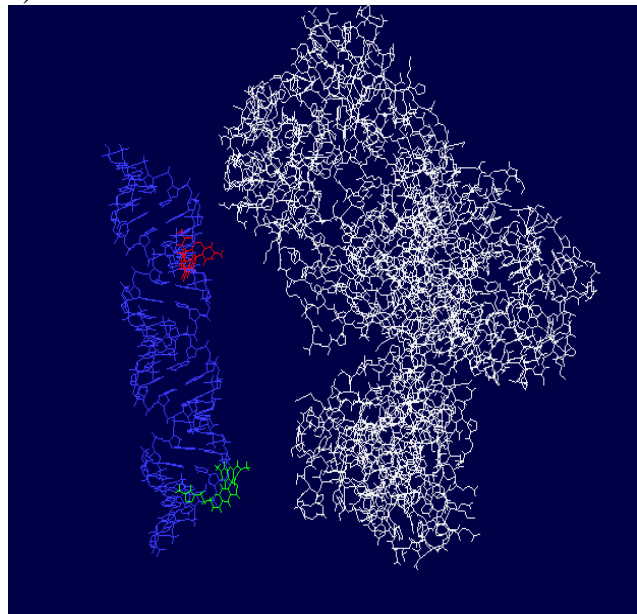

d) **ON8:DNA – mAb33**

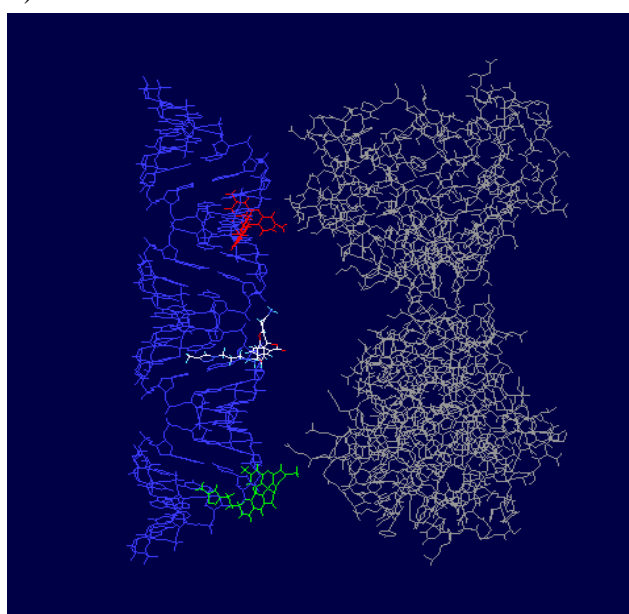

Representations of binding modes between fluorescent nucleic acid complexes and proteins used in this study: a) **ON8:DNA** binding BSA, resulting in light-up of fluorescence; b) **ON7:DNA** binding dsDNA-mAb33, resulting in light-up of fluorescence; c) **ON7:DNA** and dsDNA-mAb32 (no binding and no fluorescence signal); d) **ON8:DNA** and dsDNA-mAb33 (no binding and no fluorescence signal). Proteins and nucleic acid complexes are indicated in white and blue, respectively; 5-R110 fluorophores are shown in red, green and white.

**Figure S8. Target titration curve for complex ON7:DNA.**

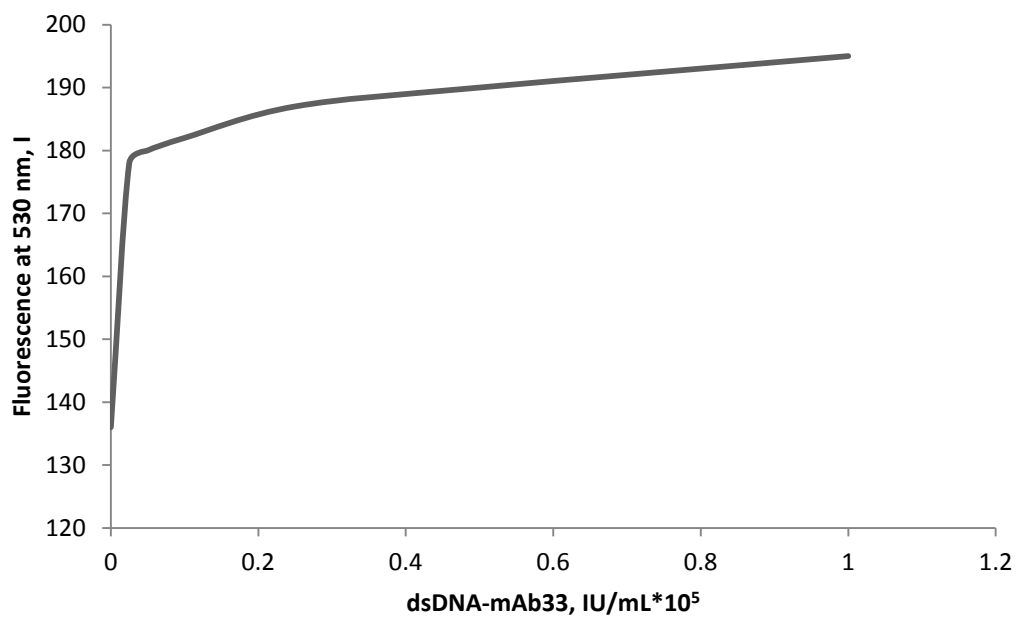

Limit of target detection (LOD) values were determined by series of incubations and subsequent analysis of dsDNA-mAb33 at concentrations ( $\times 10^5$ ): 1 IU/mL, 0.5 IU/mL, 0.25 IU/mL, 0.1 IU/mL, 0.05 IU/mL, 0.01 IU/mL, and **ON7**:DNA at concentration 0.5  $\mu$ M. Fluorescence intensities were measured at  $\lambda^{\text{fl}}$  530 nm.
